# Supplementary material for: Is Living in a U.S. Coastal City Good for One’s Health?
Source: MDPI journal article supplement (doi:10.3390/ijerph18168399), 2021-08-09
Supplement: s1 [file s1]

Supplemental Table S1: List of MMSAs included in study and years for which SMART datasets were available.

**Gulf of Mexico Coastal MMSAs**

Corpus Christi, TX, Metropolitan Statistical Area: 2014-2017  
Crestview-Fort Walton Beach-Destin, FL, Metropolitan Statistical Area: 2013, 2016, 2017  
Gulfport-Biloxi-Pascagoula, MS, Metropolitan Statistical Area: 2013, 2015  
New Orleans-Metairie, LA, Metropolitan Statistical Area: all years  
North Port-Sarasota-Bradenton, FL, Metropolitan Statistical Area: 2013, 2014, 2016, 2017  
Panama City, FL, Metropolitan Statistical Area: 2013, 2016, 2017  
Pensacola-Ferry Pass-Brent, FL, Metropolitan Statistical Area: 2013, 2016, 2017  
Tampa-St. Petersburg-Clearwater, FL, Metropolitan Statistical Area: all years

**Non-Gulf of Mexico Coastal MMSAs**

Baltimore-Columbia-Towson, MD, Metropolitan Statistical Area: all years  
Boston, MA, Metropolitan Division: all years  
Buffalo-Cheektowaga-Niagara Falls, NY, Metropolitan Statistical Area: 2013, 2015-2017  
Cambridge-Newton-Framingham, MA, Metropolitan Division: all years  
Charleston-North Charleston, SC, Metropolitan Statistical Area: all years  
Chicago-Naperville-Elgin, IL-IN-WI, Metropolitan Statistical Area: all years  
Cleveland-Elyria, OH, Metropolitan Statistical Area: all years  
Deltona-Daytona Beach-Ormond Beach, FL, Metropolitan Statistical Area: 2013, 2016, 2017  
Duluth, MN-WI, Metropolitan Statistical Area: all years  
Hilton Head Island-Bluffton-Beaufort, SC, Metropolitan Statistical Area: all years  
Los Angeles-Long Beach-Anaheim, CA, Metropolitan Statistical Area: all years  
Miami-Fort Lauderdale-West Palm Beach, FL, Metropolitan Statistical Area: all years  
Milwaukee-Waukesha-West Allis, WI, Metropolitan Statistical Area: all years  
Myrtle Beach-Conway-North Myrtle Beach, SC-NC, Metropolitan Statistical Area: all years  
Nassau County-Suffolk County, NY, Metropolitan Division: all years  
New York-Jersey City-White Plains, NY-NJ, Metropolitan Division: all years  
Newark, NJ-PA, Metropolitan Division: all years  
Oakland-Hayward-Berkeley, CA, Metropolitan Division: all years  
Port St. Lucie, FL, Metropolitan Statistical Area: 2013, 2016, 2017  
Portland-South Portland, ME, Metropolitan Statistical Area: all years  
Providence-Warwick, RI-MA, Metropolitan Statistical Area: all years  
Rochester, NY, Metropolitan Statistical Area: 2013, 2015-2017  
Salisbury, MD-DE, Metropolitan Statistical Area: all years  
San Francisco-Redwood City-South San Francisco, CA, Metropolitan Division: 2013, 2015, 2016  
San Jose-Sunnyvale-Santa Clara, CA, Metropolitan Statistical Area: 2015, 2016  
Seattle-Bellevue-Everett, WA, Metropolitan Division: all years  
Toledo, OH, Metropolitan Statistical Area: all years  
Virginia Beach-Norfolk-Newport News, VA-NC, Metropolitan Statistical Area: all years  
Wilmington, DE-MD-NJ, Metropolitan Division: all years

1.

**Gulf of Mexico Non-Coastal MMSAs**

Atlanta-Sandy Springs-Roswell, GA, Metropolitan Statistical Area: all years  
Augusta-Richmond County, GA-SC, Metropolitan Statistical Area: all years  
Austin-Round Rock, TX, Metropolitan Statistical Area: all years: all years  
Baton Rouge, LA, Metropolitan Statistical Area: all years  
Birmingham-Hoover, AL, Metropolitan Statistical Area: all years  
College Station-Bryan, TX, Metropolitan Statistical Area: 2014-2017  
Dallas-Plano-Irving, TX, Metropolitan Division: all years  
Fort Worth-Arlington, TX, Metropolitan Division: all years  
Gainesville, FL, Metropolitan Statistical Area: 2013, 2016, 2017  
Houston-The Woodlands-Sugar Land, TX, Metropolitan Statistical Area: all years  
Jackson, MS, Metropolitan Statistical Area: 2013, 2015-2017  
Lafayette, LA, Metropolitan Statistical Area: 2014  
Montgomery, AL, Metropolitan Statistical Area: 2014  
Orlando-Kissimmee-Sanford, FL, Metropolitan Statistical Area: all years  
San Antonio-New Braunfels, TX, Metropolitan Statistical Area: all years  
Shreveport-Bossier City, LA, Metropolitan Statistical Area: 2013, 2014  
Tallahassee, FL, Metropolitan Statistical Area: 2013, 2016, 2017  
Tuscaloosa, AL, Metropolitan Statistical Area: 2014-2017

**Non-Gulf of Mexico Non-Coastal MMSAs**

Aberdeen, SD, Micropolitan Statistical Area: 2014, 2015, 2017  
Akron, OH, Metropolitan Statistical Area: 2013, 2015  
Albany-Schenectady-Troy, NY, Metropolitan Statistical Area: 2015-2017  
Albuquerque, NM, Metropolitan Statistical Area: all years  
Allentown-Bethlehem-Easton, PA-NJ, Metropolitan Statistical Area: all years  
Beckley, WV, Metropolitan Statistical Area: 2016  
Berlin, NH-VT, Micropolitan Statistical Area: 2014, 2016  
Billings, MT, Metropolitan Statistical Area: all years  
Binghamton, NY, Metropolitan Statistical Area: 2016  
Bismarck, ND, Metropolitan Statistical Area: all years  
Boise City, ID, Metropolitan Statistical Area: all years  
Burlington-South Burlington, VT, Metropolitan Statistical Area: all years  
Camden, NJ, Metropolitan Division: all years  
Cedar Rapids, IA, Metropolitan Statistical Area: 2013, 2014, 2016, 2017  
Charleston, WV, Metropolitan Statistical Area: all years  
Charlotte-Concord-Gastonia, NC-SC, Metropolitan Statistical Area: all years  
Chattanooga, TN-GA, Metropolitan Statistical Area: 2013, 2016  
Cincinnati, OH-KY-IN, Metropolitan Statistical Area: all years  
Claremont-Lebanon, NH-VT, Micropolitan Statistical Area: all years  
Colorado Springs, CO, Metropolitan Statistical Area: all years

Columbia, SC, Metropolitan Statistical Area: all years  
Columbus, OH, Metropolitan Statistical Area: all years  
Cumberland, MD-WV, Metropolitan Statistical Area: 2016  
Davenport-Moline-Rock Island, IA-IL, Metropolitan Statistical Area: 2013  
Dayton, OH, Metropolitan Statistical Area: all years  
Denver-Aurora-Lakewood, CO, Metropolitan Statistical Area: all years  
Des Moines-West Des Moines, IA, Metropolitan Statistical Area: all years  
Durham-Chapel Hill, NC, Metropolitan Statistical Area: 2013  
Dutchess County-Putnam County, NY, Metropolitan Division: 2016  
El Paso, TX, Metropolitan Statistical Area: all years  
Evansville, IN-KY, Metropolitan Statistical Area: 2013, 2014, 2017  
Fargo, ND-MN, Metropolitan Statistical Area: all years  
Fayetteville-Springdale-Rogers, AR-MO, Metropolitan Statistical Area: all years  
Florence, SC, Metropolitan Statistical Area: 2015, 2017  
Fort Smith, AR-OK, Metropolitan Statistical Area: 2013  
Fort Wayne, IN, Metropolitan Statistical Area: 2013, 2014, 2016, 2017  
Glens Falls, NY, Metropolitan Statistical Area: 2016  
Grand Forks, ND-MN, Metropolitan Statistical Area: 2013, 2016, 2017  
Grand Island, NE, Metropolitan Statistical Area: all years  
Grand Rapids-Wyoming, MI, Metropolitan Statistical Area: all years  
Greensboro-High Point, NC, Metropolitan Statistical Area: 2013, 2014  
Greenville-Anderson-Mauldin, SC, Metropolitan Statistical Area: all years  
Hagerstown-Martinsburg, MD-WV, Metropolitan Statistical Area: all years  
Hartford-West Hartford-East Hartford, CT, Metropolitan Statistical Area: all years  
Huntington-Ashland, WV-KY-OH, Metropolitan Statistical Area: all years  
Idaho Falls, ID, Metropolitan Statistical Area: 2013-2015  
Indianapolis-Carmel-Anderson, IN, Metropolitan Statistical Area: all years  
Jacksonville, FL, Metropolitan Statistical Area: all years  
Kansas City, MO-KS, Metropolitan Statistical Area: all years  
Kennewick-Richland, WA, Metropolitan Statistical Area: 2015  
Kingsport-Bristol-Bristol, TN-VA, Metropolitan Statistical Area: all years  
Knoxville, TN, Metropolitan Statistical Area: all years  
Lansing-East Lansing, MI, Metropolitan Statistical Area: 2013, 2016, 2017  
Lexington-Fayette, KY, Metropolitan Statistical Area: 2013, 2014, 2017  
Lincoln, NE, Metropolitan Statistical Area: all years  
Little Rock-North Little Rock-Conway, AR, Metropolitan Statistical Area: all years  
Logan, UT-ID, Metropolitan Statistical Area: 2013-2016  
Louisville/Jefferson County, KY-IN, Metropolitan Statistical Area: all years  
Lubbock, TX, Metropolitan Statistical Area: 2013  
Madison, WI, Metropolitan Statistical Area: 2014  
Manhattan, KS, Metropolitan Statistical Area: 2013, 2015, 2017

Memphis, TN-MS-AR, Metropolitan Statistical Area: all years  
Minneapolis-St. Paul-Bloomington, MN-WI, Metropolitan Statistical Area: all years  
Minot, ND, Micropolitan Statistical Area: all years  
Montgomery County-Bucks County-Chester County, PA, Metropolitan Division: all years  
Nashville-Davidson--Murfreesboro--Franklin, TN, Metropolitan Statistical Area: all years  
Norfolk, NE, Micropolitan Statistical Area: 2013-2016  
North Platte, NE, Micropolitan Statistical Area: all years  
Ogden-Clearfield, UT, Metropolitan Statistical Area: all years  
Oklahoma City, OK, Metropolitan Statistical Area: all years  
Omaha-Council Bluffs, NE-IA, Metropolitan Statistical Area: all years  
Philadelphia, PA, Metropolitan Division: all years  
Phoenix-Mesa-Scottsdale, AZ, Metropolitan Statistical Area: all years  
Pittsburgh, PA, Metropolitan Statistical Area: all years  
Portland-Vancouver-Hillsboro, OR-WA, Metropolitan Statistical Area: all years  
Provo-Orem, UT, Metropolitan Statistical Area: all years  
Raleigh, NC, Metropolitan Statistical Area: 2013-2016  
Rapid City, SD, Metropolitan Statistical Area: all years  
Reno, NV, Metropolitan Statistical Area: all years  
Richmond, VA, Metropolitan Statistical Area: all years  
Riverside-San Bernardino-Ontario, CA, Metropolitan Statistical Area: all years  
Roanoke, VA, Metropolitan Statistical Area: 2014  
Rochester, MN, Metropolitan Statistical Area: 2014-2017  
Rockingham County--Strafford County, NH, Metropolitan Division: all years  
Sacramento--Roseville--Arden-Arcade, CA, Metropolitan Statistical Area: all years  
Salem, OR, Metropolitan Statistical Area: 2013, 2016  
Salina, KS, Micropolitan Statistical Area: 2013, 2015, 2017  
Salt Lake City, UT, Metropolitan Statistical Area: all years  
Scottsbluff, NE, Micropolitan Statistical Area: all years  
Scranton--Wilkes-Barre--Hazleton, PA, Metropolitan Statistical Area: 2013  
Silver Spring-Frederick-Rockville, MD, Metropolitan Division: all years  
Sioux City, IA-NE-SD, Metropolitan Statistical Area: all years  
Sioux Falls, SD, Metropolitan Statistical Area: all years  
South Bend-Mishawaka, IN-MI, Metropolitan Statistical Area: 2017  
Spartanburg, SC, Metropolitan Statistical Area: all years  
Spokane-Spokane Valley, WA, Metropolitan Statistical Area: all years  
Springfield, MA, Metropolitan Statistical Area: all years  
St. Cloud, MN, Metropolitan Statistical Area: 2014-2017  
St. Louis, MO-IL, Metropolitan Statistical Area: all years  
Syracuse, NY, Metropolitan Statistical Area: 2016  
Topeka, KS, Metropolitan Statistical Area: all years  
Tulsa, OK, Metropolitan Statistical Area: all years

Utica-Rome, NY, Metropolitan Statistical Area: 2016  
Warren-Troy-Farmington Hills, MI, Metropolitan Division: all years  
Washington-Arlington-Alexandria, DC-VA-MD-WV, Metropolitan Division: all years  
Wichita Falls, TX, Metropolitan Statistical Area: 2014-2017  
Wichita, KS, Metropolitan Statistical Area: all years  
Winston-Salem, NC, Metropolitan Statistical Area: 2013  
Worcester, MA-CT, Metropolitan Statistical Area: all years  
Youngstown-Warren-Boardman, OH-PA, Metropolitan Statistical Area: 2014
